# Supplementary material for: A novel route to the engineering of zirconium immobilized nano-scale carbon for arsenate removal from water
Source: Royal Society of Chemistry journal article supplement (doi:10.1039/c3ta10858a), 2013-01-01
Supplement: c3ta10858a.pdf [file c3ta10858a.pdf]

# A Novel Route to the Engineering of Zirconium Immobilized Nano-scale Carbon for Arsenate Removal from Water

Narahari Mahanta and J. Paul Chen\*

Department of Civil and Environment Engineering  
National University of Singapore, 10 Kent Ridge Crescent, Singapore 119260.

## Supporting information

**SI 1:** EDX analysis of ZNC.

**SI 2:** TEM analysis of ZNC.

**SI 3:** Cell viability test with breast cancer stem cell (MCF7) on the designed nanoparticles up to 5 days of analysis. The control experiment was normalised as the same cell line was used with different time scales.

**SI 4:** EDX analysis of arsenate adsorbed on to the ZNC.

**SI 5:** Comparison of arsenic adsorption efficiency of the functionalized carbon particles with the as prepared carbon particles (sorbent dosage = 0.25 g/L, pH = 7 and pH = 2.5, initial concentration = 50 mg/L, T = 22 ± 1 °C).

**SI 6:** Graphs on Final pH after adsorption vs. adsorption efficiency ( $q_e$ ).

**SI 7:** Effect of humic acid on adsorption of arsenate on to the functionalized adsorbent (sorbent dosage = 1 g/L, pH = 7, initial concentration = 100 mg/L, T = 22 ± 1 °C).

**SI 8:** Effect of coexisting anions: (a) fluoride; (b) silicate; (c) phosphate; (d) nitrate on the adsorption of the arsenate onto the sorbent (sorbent dosage = 1 g/L, pH = 7, initial concentration = 100 mg/L, T = 22 ± 1 °C).

**SI 9:** The atomic percentage data of different elements achieved from wide scan XPS spectra.

SI 1: EDX analysis of ZNC.

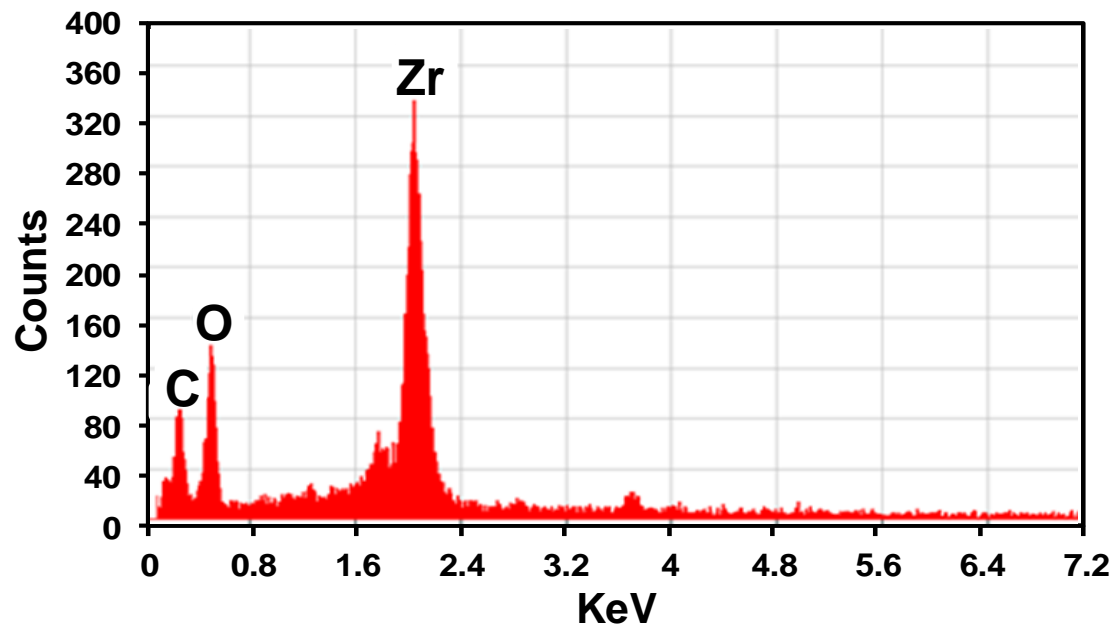

ZAF Method Standardless Quantitative Analysis

Fitting Coefficient : 0.4231

| Element | (keV) | mass % | Error% | Atomic % |
|---------|-------|--------|--------|----------|
| C K*    | 0.277 | 26.31  | 0.09   | 49.26    |
| O K     | 0.525 | 28.67  | 0.18   | 40.30    |
| Zr L*   | 2.042 | 39.98  | 0.28   | 9.86     |
| Pt M*   | 2.048 | 5.04   | 0.36   | 0.58     |
| Total   |       | 100.00 |        | 100.00   |

**SI 2:** TEM analysis of ZNC.

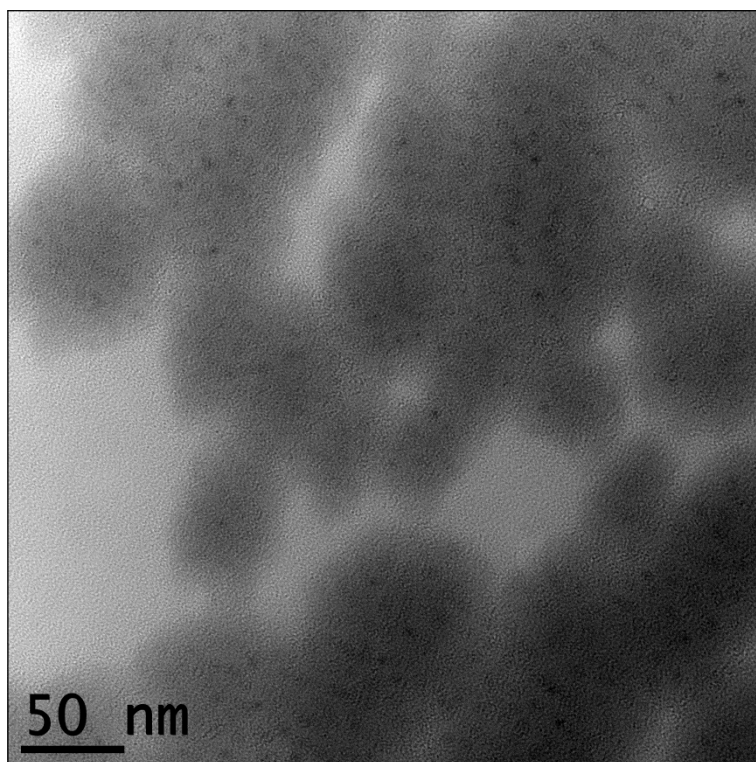

**SI 3:** Cell viability test with breast cancer stem cell (MCF7) on the designed nanoparticles up to 5 days of analysis. The control experiment was normalised as the same cell line was used with different time scales.

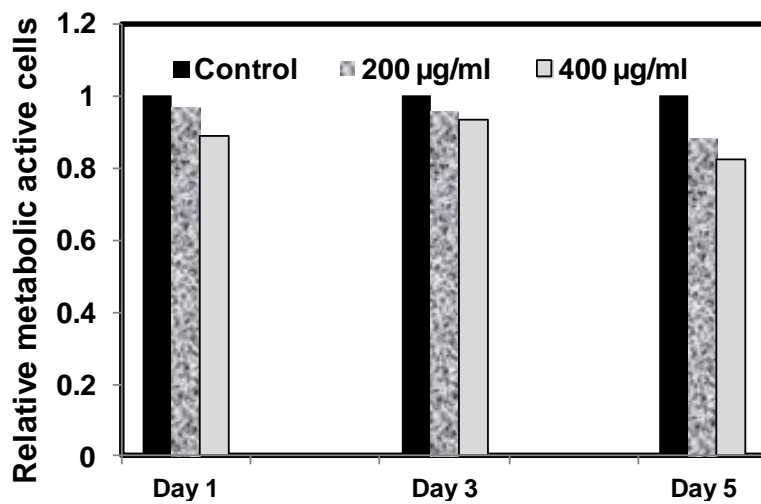

SI 4: EDX analysis of arsenate adsorbed on to the ZNC.

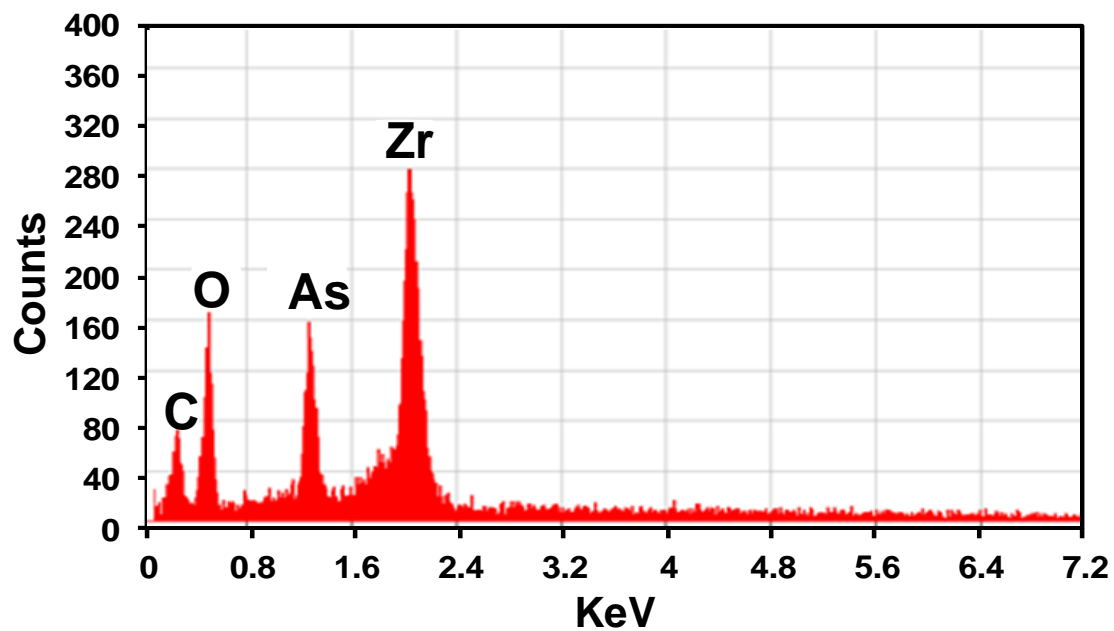

ZAF Method Standardless Quantitative Analysis

Fitting Coefficient : 0.3877

| Element | (keV) | mass % | Error% | Atomic % |
|---------|-------|--------|--------|----------|
| C K*    | 0.277 | 17.49  | 0.09   | 39.48    |
| O K     | 0.525 | 26.08  | 0.15   | 44.19    |
| As L*   | 0.282 | 13.47  | 0.15   | 4.88     |
| Zr L*   | 2.042 | 34.68  | 0.28   | 10.31    |
| Pt M*   | 2.048 | 8.28   | 0.36   | 1.15     |
| Total   |       | 100.00 |        | 100.00   |

**SI 5:** Comparison of arsenic adsorption efficiency of the functionalized carbon particles with the as prepared carbon particles (sorbent dosage = 0.25 g/L, pH = 7 and pH = 2.5, initial concentration = 50 mg/L,  $T = 22 \pm 1$  °C).

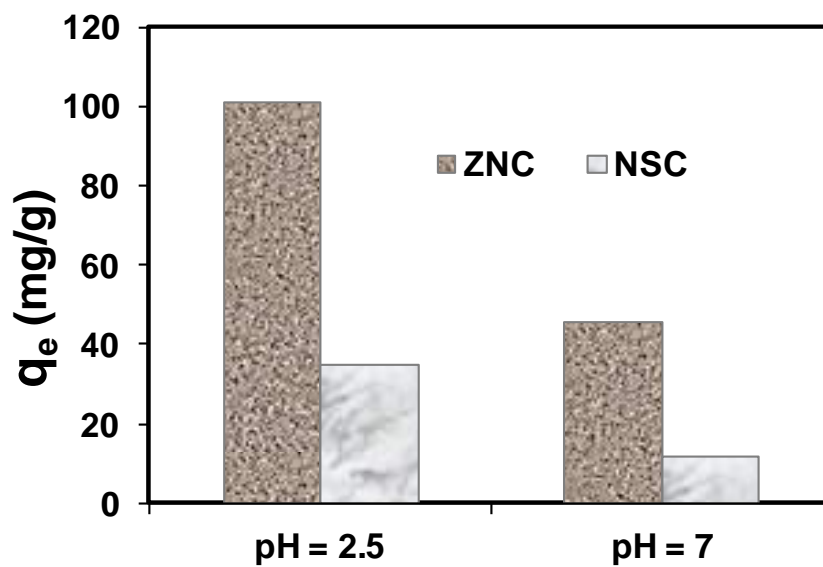

**SI 6:** Graphs on Final pH after adsorption vs. adsorption efficiency ( $q_e$ ).

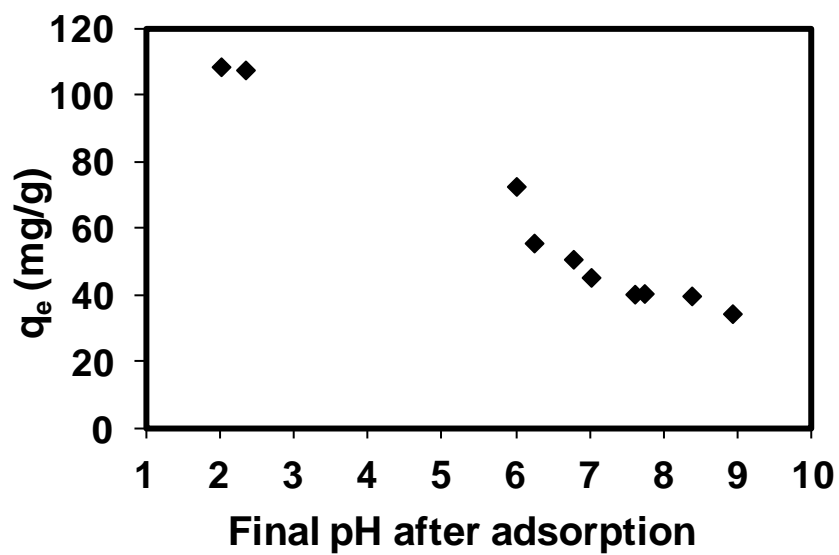

**SI 7:** Effect of humic acid on adsorption of arsenate on to the functionalized adsorbent (sorbent dosage = 1 g/L, pH = 7, initial concentration = 100 mg/L, T = 22 ± 1 °C).

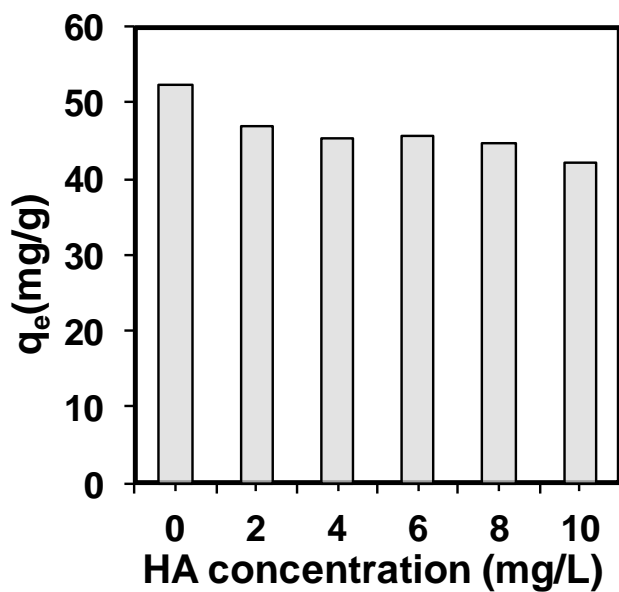



**SI 8:** Effect of coexisting anions: (a) fluoride; (b) silicate; (c) phosphate; (d) nitrate on the adsorption of the arsenate onto the sorbent (sorbent dosage = 1 g/L, pH = 7, initial concentration = 100 mg/L, T = 22 ± 1 °C).

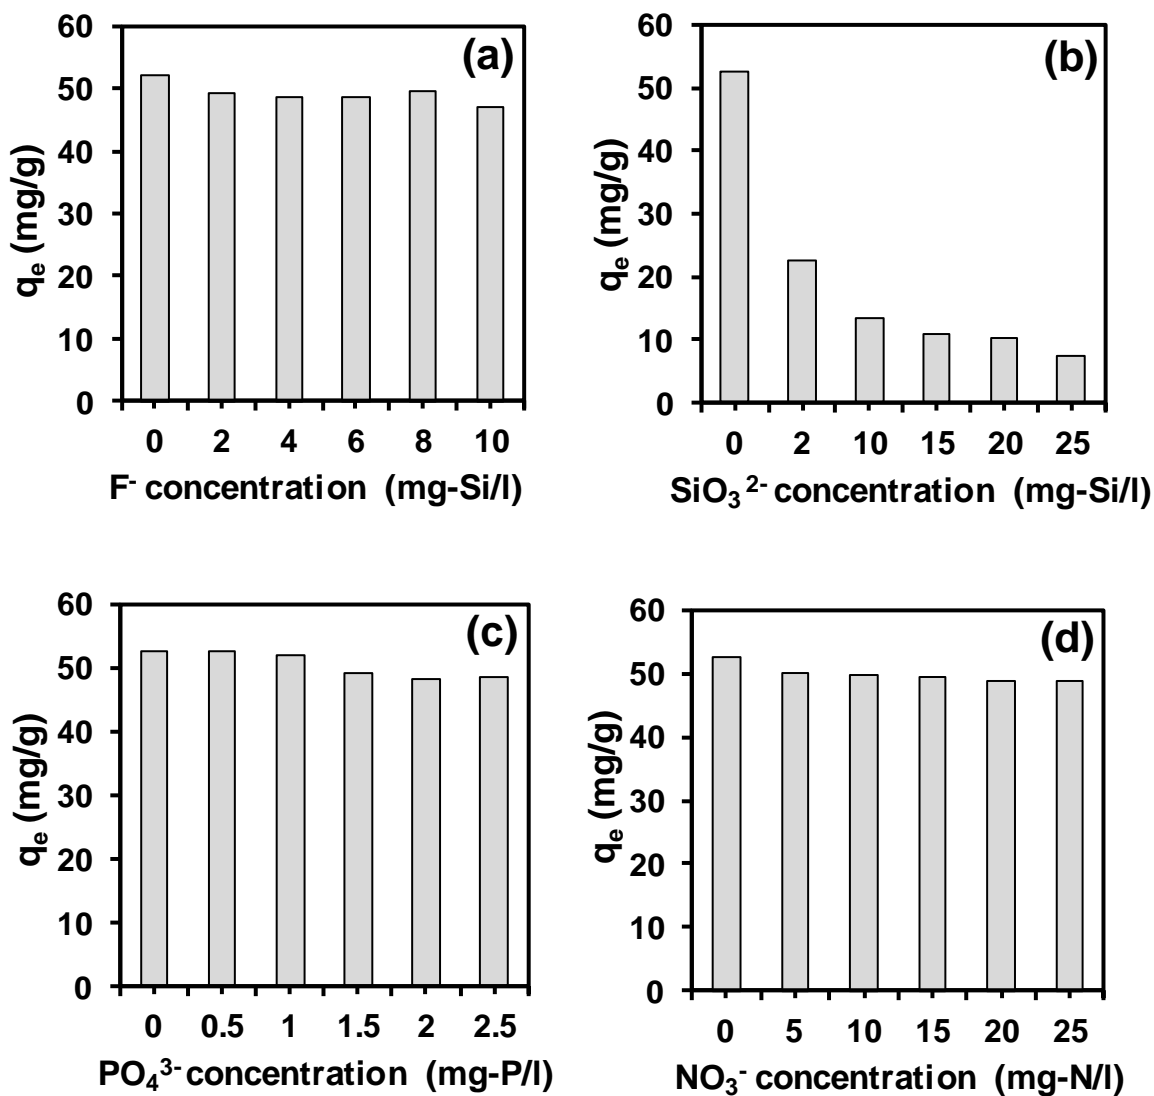

**SI 9:** The atomic percentage data of different elements achieved from wide scan XPS spectra.

| Element | Atomic % |
|---------|----------|
| O1s     | 58.5     |
| C1s     | 22.2     |
| Zr3d    | 13.5     |
| As3d    | 5.8      |
